# Supplementary material for: KSb(BeF3)F3: a totally fluorine strategy for achieving wide bandgap and large birefringence
Source: Royal Society of Chemistry journal article supplement (doi:10.1039/d2tc04112j), 2022-01-01
Supplement: d2tc04112j1.pdf [file d2tc04112j1.pdf]

## Electronic Supporting Information

# KSb(BeF<sub>3</sub>)F<sub>3</sub>: Totally Fluorine Strategy Achieving Wide Bandgap and Large Birefringence

Xuehua Dong,<sup>a</sup> Ying Long,<sup>b</sup> Ling Huang,<sup>\*a</sup> Liling Cao,<sup>a</sup> Daojiang Gao,<sup>a</sup> Jian Bi,<sup>a</sup> and Guohong Zou<sup>\*b</sup>

<sup>a</sup> College of Chemistry and Materials Science, Sichuan Normal University, Chengdu, 610066, P. R. China.

<sup>b</sup> College of Chemistry, Sichuan University, Chengdu, 610065, P. R. China.

E-mail: huangl026@sina.com, zough@scu.edu.cn.

## Table of contents

| Sections   | Titles                                                                                                                                                                                                                                                                                 | Pages |
|------------|----------------------------------------------------------------------------------------------------------------------------------------------------------------------------------------------------------------------------------------------------------------------------------------|-------|
| Table S1   | Atomic coordinates and equivalent isotropic displacement parameters, and calculated Bond Valence Sum for $\text{KSb}(\text{BeF}_3)\text{F}_3$ . $U_{(\text{eq})}$ is defined as one third of the trace of the orthogonalized $U_{ij}$ tensor.                                          | S3    |
| Table S2   | Bond lengths [ $\text{\AA}$ ] and angles [ $^\circ$ ] for $\text{KSb}(\text{BeF}_3)\text{F}_3$ .                                                                                                                                                                                       | S4    |
| Table S3   | Anionic structures and band gap of most reported antimony-based inorganic optical crystals.                                                                                                                                                                                            | S5    |
| Fig. S1    | The bond lengths of $\text{SbF}_6$ octahedron in $\text{KSb}(\text{BeF}_3)\text{F}_3$ .                                                                                                                                                                                                | S6    |
| Fig. S2    | Energy-dispersive analysis by X-ray (EDX) data for $\text{KSb}(\text{BeF}_3)\text{F}_3$ .                                                                                                                                                                                              | S6    |
| Fig. S3    | (a) The TGA spectrum for $\text{KSb}(\text{BeF}_3)\text{F}_3$ ; (b) The Powder XRD patterns of the residue of TGA for $\text{KSb}(\text{BeF}_3)\text{F}_3$ . The result indicated that the residue of TGA for $\text{KSb}(\text{BeF}_3)\text{F}_3$ has changed to amorphous substance. | S6    |
| Fig. S4    | The IR spectrum for $\text{KSb}(\text{BeF}_3)\text{F}_3$ .                                                                                                                                                                                                                             | S6    |
| References |                                                                                                                                                                                                                                                                                        | S7-S8 |

**Table S1.** Atomic coordinates and equivalent isotropic displacement parameters, and calculated Bond Valence Sum for  $\text{KSb}(\text{BeF}_3)\text{F}_3$ .  $U_{\text{eq}}$  is defined as one third of the trace of the orthogonalized  $U_{ij}$  tensor.

| atom | x            | y             | z            | $U_{\text{eq}}(\text{\AA}^2)$ | BVS  |
|------|--------------|---------------|--------------|-------------------------------|------|
| Sb1  | 0.63577 (2)  | 0.38502 (3)   | 0.43311 (2)  | 0.01584 (8)                   | 3.07 |
| K1   | 0.56279 (4)  | -0.18109 (15) | 0.15299 (5)  | 0.02744 (14)                  | 0.85 |
| Be1  | 0.76924 (19) | 0.7423 (8)    | 0.3233 (3)   | 0.0220 (7)                    | 1.99 |
| F1   | 0.53872 (9)  | 0.3033 (4)    | 0.44162 (13) | 0.0246 (3)                    | 1.09 |
| F2   | 0.58593 (11) | 0.3142 (4)    | 0.28293 (13) | 0.0317 (4)                    | 1.11 |
| F3   | 0.59471 (10) | 0.7881 (4)    | 0.39518 (15) | 0.0344 (4)                    | 1.08 |
| F4   | 0.72684 (16) | 0.6374 (5)    | 0.3860 (2)   | 0.0630 (7)                    | 0.80 |
| F5   | 0.78329 (9)  | 0.4708 (4)    | 0.26231 (15) | 0.0335 (4)                    | 0.63 |
| F6   | 0.84627 (10) | 0.8833 (3)    | 0.39239 (14) | 0.0326 (4)                    | 0.79 |

**Table S2.** Selected Bond lengths (Å) and angles (deg) for  $\text{KSb}(\text{BeF}_3)\text{F}_3$ .

|                                           |             |                                          |             |
|-------------------------------------------|-------------|------------------------------------------|-------------|
| Sb1—F2                                    | 1.9340 (16) | K1—F3 <sup>viii</sup>                    | 3.188 (2)   |
| Sb1—F3                                    | 1.9310 (16) | K1—F3 <sup>vii</sup>                     | 2.8239 (19) |
| Sb1—F6 <sup>iv</sup>                      | 2.5379 (18) | K1—F6 <sup>ix</sup>                      | 3.2655 (18) |
| Sb1—F4                                    | 2.400 (2)   | K1—F6 <sup>x</sup>                       | 2.8540 (18) |
| K1—F1 <sup>v</sup>                        | 2.8244 (17) | K1—F5 <sup>ix</sup>                      | 2.7735 (18) |
| K1—F1 <sup>vi</sup>                       | 2.8514 (17) | F6—Be1                                   | 1.521 (4)   |
| K1—F1 <sup>vii</sup>                      | 2.9305 (17) | F4—Be1                                   | 1.507 (4)   |
| K1—F2 <sup>viii</sup>                     | 2.7943 (18) | Be1—F5                                   | 1.564 (4)   |
| F3—Sb1—F4                                 | 76.00 (8)   | F3 <sup>vii</sup> —K1—F1 <sup>vi</sup>   | 93.38 (5)   |
| F4—Sb1—F6 <sup>iv</sup>                   | 105.20 (8)  | F3 <sup>vii</sup> —K1—F1 <sup>v</sup>    | 57.49 (5)   |
| F1 <sup>v</sup> —K1—F1 <sup>vii</sup>     | 100.36 (5)  | F3 <sup>vii</sup> —K1—F3 <sup>viii</sup> | 87.35 (5)   |
| F1 <sup>vi</sup> —K1—F1 <sup>vii</sup>    | 66.39 (5)   | F3 <sup>viii</sup> —K1—F6 <sup>ix</sup>  | 111.35 (5)  |
| F1 <sup>v</sup> —K1—F3 <sup>viii</sup>    | 108.33 (5)  | F3 <sup>vii</sup> —K1—F6 <sup>ix</sup>   | 127.13 (5)  |
| F1 <sup>vii</sup> —K1—F3 <sup>viii</sup>  | 103.81 (5)  | F6 <sup>x</sup> —K1—F3 <sup>viii</sup>   | 110.51 (5)  |
| F1 <sup>v</sup> —K1—F6 <sup>x</sup>       | 140.94 (5)  | F6 <sup>x</sup> —K1—F6 <sup>ix</sup>     | 92.26 (5)   |
| F1 <sup>vi</sup> —K1—F6 <sup>ix</sup>     | 78.79 (5)   | F5 <sup>ix</sup> —K1—F1 <sup>vii</sup>   | 140.44 (5)  |
| F1 <sup>vii</sup> —K1—F6 <sup>ix</sup>    | 144.84 (5)  | F5 <sup>ix</sup> —K1—F1 <sup>v</sup>     | 114.90 (5)  |
| F1 <sup>v</sup> —K1—F6 <sup>ix</sup>      | 69.65 (4)   | F5 <sup>ix</sup> —K1—F1 <sup>vi</sup>    | 99.37 (5)   |
| F1 <sup>vi</sup> —K1—F6 <sup>x</sup>      | 58.94 (5)   | F5 <sup>ix</sup> —K1—F2 <sup>viii</sup>  | 93.94 (5)   |
| F2 <sup>viii</sup> —K1—F1 <sup>vi</sup>   | 115.94 (5)  | F5 <sup>ix</sup> —K1—F3 <sup>viii</sup>  | 82.36 (5)   |
| F2—K1—F1 <sup>vii</sup>                   | 143.63 (5)  | F5 <sup>ix</sup> —K1—F6 <sup>x</sup>     | 67.06 (5)   |
| F2—K1—F1 <sup>v</sup>                     | 66.07 (5)   | F5 <sup>ix</sup> —K1—F6 <sup>ix</sup>    | 48.06 (5)   |
| F2—K1—F1 <sup>vi</sup>                    | 138.24 (5)  | Sb1—F1—K1 <sup>iii</sup>                 | 111.13 (7)  |
| F2 <sup>viii</sup> —K1—F1 <sup>v</sup>    | 142.99 (5)  | Sb1—F1—K1 <sup>v</sup>                   | 126.96 (7)  |
| F2—K1—F2 <sup>viii</sup>                  | 105.44 (6)  | Sb1—F1—K1 <sup>i</sup>                   | 107.55 (6)  |
| F2—K1—F3 <sup>vii</sup>                   | 92.97 (5)   | K1 <sup>v</sup> —F1—K1 <sup>i</sup>      | 100.36 (5)  |
| F2 <sup>viii</sup> —K1—F3 <sup>viii</sup> | 50.63 (4)   | K1 <sup>v</sup> —F1—K1 <sup>iii</sup>    | 96.84 (5)   |
| F2 <sup>viii</sup> —K1—F3 <sup>vii</sup>  | 88.57 (6)   | Sb1—F2—K1 <sup>ii</sup>                  | 116.69 (7)  |
| F2—K1—F6 <sup>x</sup>                     | 137.73 (6)  | Sb1—F2—K1                                | 135.52 (8)  |
| F2 <sup>viii</sup> —K1—F6 <sup>x</sup>    | 70.36 (5)   | K1—F2—K1 <sup>ii</sup>                   | 105.44 (6)  |
| F2 <sup>viii</sup> —K1—F6 <sup>ix</sup>   | 141.92 (5)  | Sb1—F3—K1 <sup>i</sup>                   | 112.62 (7)  |
| F2—K1—F5 <sup>ix</sup>                    | 71.45 (6)   | K1 <sup>i</sup> —F3—K1 <sup>ii</sup>     | 92.41 (5)   |
| F3 <sup>vii</sup> —K1—F1 <sup>vii</sup>   | 53.79 (4)   | Sb1 <sup>iv</sup> —F6—K1 <sup>xi</sup>   | 129.20 (7)  |
| F6—Be1—F5                                 | 108.3 (2)   | Sb1 <sup>iv</sup> —F6—K1 <sup>xii</sup>  | 95.63 (5)   |
| F4—Be1—F6                                 | 112.4 (3)   | K1 <sup>xii</sup> —F6—K1 <sup>xi</sup>   | 92.26 (5)   |
| F4—Be1—F5 <sup>xi</sup>                   | 108.1 (2)   | Be1—F6—K1 <sup>xii</sup>                 | 131.45 (16) |
| F5—Be1—F5 <sup>xi</sup>                   | 106.3 (2)   | Be1—F6—K1 <sup>xi</sup>                  | 91.36 (15)  |
| Be1—F5—K1 <sup>xi</sup>                   | 110.78 (15) | Be1—F4—Sb1                               | 161.3 (2)   |
| Be1 <sup>ix</sup> —F5—K1 <sup>xi</sup>    | 113.50 (14) | F6—Be1—F5 <sup>xi</sup>                  | 111.3 (2)   |

Symmetry codes: (i)  $-x+1, y+1, -z+1/2$ ; (ii)  $x, y+1, z$ ; (iii)  $x, -y, z+1/2$ ; (iv)  $-x+3/2, -y+3/2, -z+1$ ; (v)  $-x+1, y, -z+1/2$ ; (vi)  $x, -y, z-1/2$ ; (vii)  $-x+1, y-1, -z+1/2$ ; (viii)  $x, y-1, z$ ; (ix)  $-x+3/2, y-1/2, -z+1/2$ ; (x)  $-x+3/2, y-3/2, -z+1/2$ ; (xi)  $-x+3/2, y+1/2, -z+1/2$ ; (xii)  $-x+3/2, y+3/2, -z+1/2$ .

**Table S3.** Anionic structures and band gap of most reported antimony-based inorganic optical crystals.

| Compounds                                                                                             | Anionic groups                         | Band gaps (eV) | Ref.      |
|-------------------------------------------------------------------------------------------------------|----------------------------------------|----------------|-----------|
| <b>KSb(BeF<sub>3</sub>)F<sub>3</sub></b>                                                              | $\text{BeF}_3^-$                       | 5.3            | This work |
| Na <sub>2</sub> SO <sub>4</sub> ·SbF <sub>3</sub>                                                     | isolated SO <sub>4</sub>               | 5.13           | [1]       |
| Rb <sub>6</sub> Sb <sub>4</sub> F <sub>12</sub> (SO <sub>4</sub> ) <sub>3</sub>                       | isolated SO <sub>4</sub>               | 5.07           | [2]       |
| NH <sub>4</sub> SbFPO <sub>4</sub> ·H <sub>2</sub> O                                                  | isolated PO <sub>4</sub>               | 5.01           | [3]       |
| Cs <sub>6</sub> Sb <sub>4</sub> F <sub>12</sub> (SO <sub>4</sub> ) <sub>3</sub>                       | isolated SO <sub>4</sub>               | 4.97           | [2]       |
| CsSbF <sub>2</sub> SO <sub>4</sub>                                                                    | isolated SO <sub>4</sub>               | 4.76           | [4]       |
| K <sub>2</sub> Sb(P <sub>2</sub> O <sub>7</sub> )F                                                    | P <sub>2</sub> O <sub>7</sub> dimer    | 4.75           | [5]       |
| RbSbF <sub>2</sub> SO <sub>4</sub>                                                                    | isolated SO <sub>4</sub>               | 4.75           | [6]       |
| K <sub>2</sub> SO <sub>4</sub> ·(SbF <sub>3</sub> ) <sub>2</sub>                                      | isolated SO <sub>4</sub>               | 4.73           | [7]       |
| Rb <sub>2</sub> SO <sub>4</sub> ·(SbF <sub>3</sub> ) <sub>2</sub>                                     | isolated SO <sub>4</sub>               | 4.69           | [7]       |
| NH <sub>4</sub> SbF <sub>2</sub> SO <sub>4</sub>                                                      | isolated SO <sub>4</sub>               | 4.67           | [3]       |
| (NH <sub>4</sub> ) <sub>2</sub> SbCl(SO <sub>4</sub> ) <sub>2</sub>                                   | isolated SO <sub>4</sub>               | 4.56           | [8]       |
| (NH <sub>4</sub> ) <sub>2</sub> SO <sub>4</sub> ·SbF <sub>3</sub>                                     | isolated SO <sub>4</sub>               | 4.54           | [1]       |
| NH <sub>4</sub> SbCl <sub>2</sub> SO <sub>4</sub>                                                     | isolated SO <sub>4</sub>               | 4.54           | [8]       |
| K <sub>2</sub> SO <sub>4</sub> ·SbF <sub>3</sub>                                                      | isolated SO <sub>4</sub>               | 4.44           | [1]       |
| Ba <sub>3</sub> Sb <sub>2</sub> (PO <sub>4</sub> ) <sub>4</sub>                                       | isolated PO <sub>4</sub>               | 4.30           | [9]       |
| K <sub>2</sub> Sb <sub>2</sub> (C <sub>2</sub> O <sub>4</sub> )F <sub>6</sub>                         | isolated C <sub>2</sub> O <sub>4</sub> | 4.27           | [10]      |
| Rb <sub>2</sub> SO <sub>4</sub> ·SbF <sub>3</sub>                                                     | isolated SO <sub>4</sub>               | 4.15           | [1]       |
| K <sub>4</sub> Sb(SO <sub>4</sub> ) <sub>3</sub> Cl                                                   | isolated SO <sub>4</sub>               | 4.12           | [11]      |
| [C(NH <sub>2</sub> ) <sub>3</sub> ]Sb(C <sub>2</sub> O <sub>4</sub> )F <sub>2</sub> ·H <sub>2</sub> O | isolated C <sub>2</sub> O <sub>4</sub> | 4.09           | [17]      |
| KSb <sub>2</sub> C <sub>2</sub> O <sub>4</sub> F <sub>5</sub>                                         | isolated C <sub>2</sub> O <sub>4</sub> | 4.06           | [12]      |
| Na <sub>2</sub> Sb <sub>2</sub> (C <sub>2</sub> O <sub>4</sub> )F <sub>6</sub>                        | isolated C <sub>2</sub> O <sub>4</sub> | 4.03           | [10]      |
| NH <sub>4</sub> Sb <sub>2</sub> (C <sub>2</sub> O <sub>4</sub> )F <sub>5</sub>                        | isolated C <sub>2</sub> O <sub>4</sub> | 3.85           | [13]      |
| RbSb(C <sub>2</sub> O <sub>4</sub> )F <sub>2</sub> ·H <sub>2</sub> O                                  | isolated C <sub>2</sub> O <sub>4</sub> | 3.83           | [17]      |
| Cs <sub>2</sub> Sb <sub>2</sub> (C <sub>2</sub> O <sub>4</sub> )F <sub>4</sub> ·H <sub>2</sub> O      | isolated C <sub>2</sub> O <sub>4</sub> | 3.81           | [10]      |
| Rb <sub>2</sub> SbF <sub>3</sub> (NO <sub>3</sub> ) <sub>2</sub>                                      | isolated NO <sub>3</sub>               | 3.76           | [14]      |
| Rb <sub>3</sub> SbF <sub>3</sub> (NO <sub>3</sub> ) <sub>3</sub>                                      | isolated NO <sub>3</sub>               | 3.75           | [15]      |
| RbSbSO <sub>4</sub> Cl <sub>2</sub>                                                                   | isolated SO <sub>4</sub>               | 3.48           | [16]      |

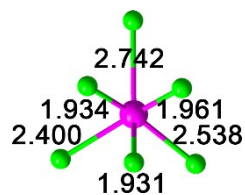

**Fig. S1** The bond lengths of  $\text{SbF}_6$  octahedron in  $\text{KSb}(\text{BeF}_3)\text{F}_3$ .

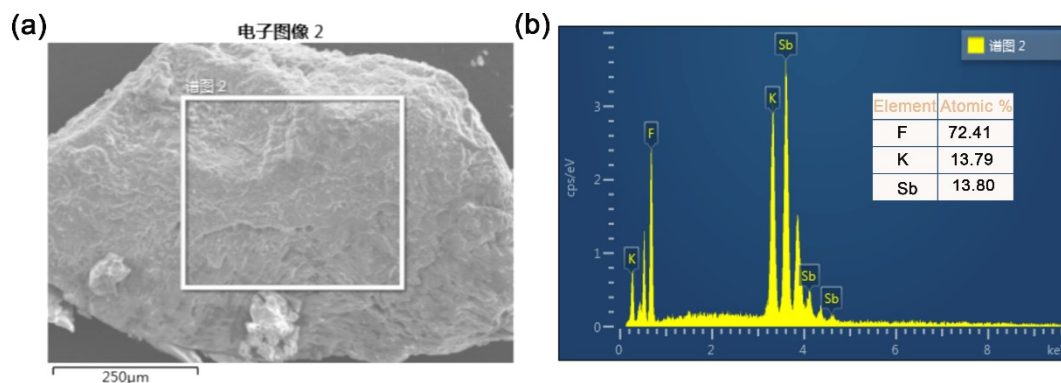

**Fig. S2** Energy-dispersive analysis by X-ray (EDX) data for  $\text{KSb}(\text{BeF}_3)\text{F}_3$ .

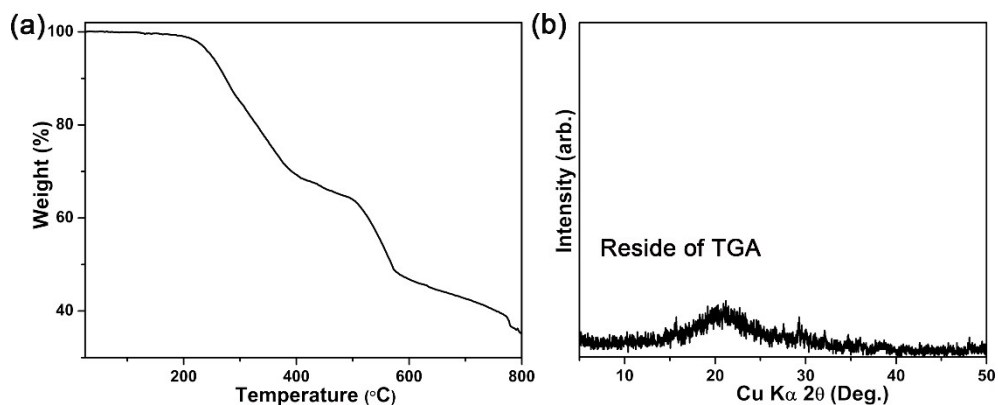

**Fig. S3** (a) The TGA spectrum for  $\text{KSb}(\text{BeF}_3)\text{F}_3$ ; (b) The Powder XRD patterns of the residue of TGA for  $\text{KSb}(\text{BeF}_3)\text{F}_3$ . The result indicated that the residue of TGA for  $\text{KSb}(\text{BeF}_3)\text{F}_3$  has changed to amorphous substance.

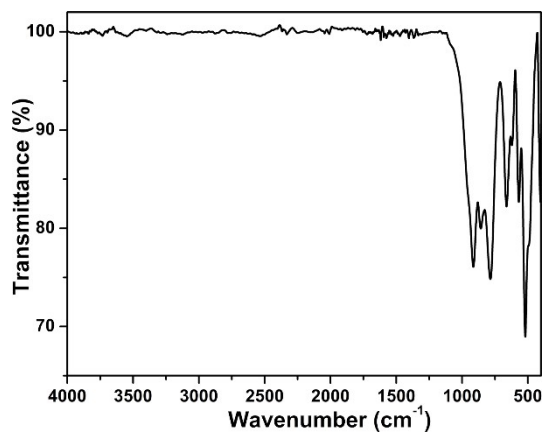

**Fig. S4** The IR spectrum for  $\text{KSb}(\text{BeF}_3)\text{F}_3$ .

## References

- [1] He, F. F.; Wang, L.; Hu, C. F.; Zhou, J.; Li, Q.; Huang, L.; Gao, D. J.; Bi, J.; Wang, X.; Zou, G. H. Cation-tuned synthesis of the  $A_2SO_4 \cdot SbF_3$  ( $A = Na^+, NH_4^+, K^+, Rb^+$ ) family with nonlinear optical properties. *Dalton Trans.* **2018**, *47*, 17486-17492.
- [2] Dong, X. H.; Long, Y.; Zhao, X. Y.; Huang, L.; Zeng, H. M.; Lin, Z. E.; Wang, X.; Zou, G. H.  $A_6Sb_4F_{12}(SO_4)_3$  ( $A = Rb, Cs$ ): Two novel antimony fluoride sulfates with unique crown-like clusters. *Inorg. Chem.* **2020**, *59*, 8345-8352.
- [3] He, F. F.; Ge, Y. W.; Zhao, X. Y.; He, J.; Huang, L.; Gao, D. J.; Bi, J.; Wang, X.; Zou, G. H. Two-stage evolution from phosphate to sulfate of new KTP-type family members as UV nonlinear optical materials through chemical cosubstitution-oriented design. *Dalton Trans.* **2020**, *49*, 5276-5282.
- [4] Dong, X. H.; Huang, L.; Hu, C. F.; Zeng, H. M.; Lin, Z. E.; Wang, X.; Ok, K. M.; Zou, G. H.  $CsSbF_2SO_4$ : An excellent ultraviolet nonlinear optical sulfate with a  $KTiOPO_4$  (KTP)-type structure. *Angew. Chem. Int. Ed.* **2019**, *58*, 6528-6534.
- [5] Deng, Y. L.; Huang, L.; Dong, X. H.; Wang, L.; Ok, K. M.; Zeng, H. M.; Lin, Z. E.; Zou, G. H.  $K_2Sb(P_2O_7)F$ : Unprecedented cairo pentagonal layer with new bifunctional genes revealing excellent optical performance. *Angew. Chem. Int. Ed.* **2020**, *59*, 21151-21156.
- [6] Yang, F.; Huang, L. J.; Zhao, X. Y.; Huang, L.; Gao, D. J.; Bi, J.; Wang, X.; Zou, G. H. An energy band engineering design to enlarge the band gap of  $KTiOPO_4$  (KTP)-type sulfates via aliovalent substitution. *J. Mater. Chem. C* **2019**, *7*, 8131-8138.
- [7] Wang, Q.; Wang, L.; Zhao, X. Y.; Huang, L.; Gao, D. J.; Bi, J.; Wang, X.; Zou, G. H. Centrosymmetric  $K_2SO_4 \cdot (SbF_3)_2$  and noncentrosymmetric  $Rb_2SO_4 \cdot (SbF_3)_2$  resulting from cooperative effects of lone pair and cation size. *Inorg. Chem. Front.* **2019**, *6*, 3125-3132.
- [8] He, F. F.; Wang, Q.; Hu, C. F.; He, W.; Luo, X. Y.; Huang, L.; Gao, D. J.; Bi, J.; Wang, X.; Zou, G. H. Centrosymmetric  $(NH_4)_2SbCl(SO_4)_2$  and non-centrosymmetric  $(NH_4)SbCl_2(SO_4)$ : synergistic effect of hydrogen-bonding interactions and lone-pair cations on the framework structures and macroscopic centricities. *Cryst. Growth Des.* **2018**, *18*, 6239-6247.
- [9] Bi, X. B.; Hu, C. L.; Kong, F.; Mao, J. G.  $Ba_3Sb_2(PO_4)_4$  and  $Cd_3Sb_2(PO_4)_4(H_2O)_2$ : Two new antimonous phosphates with distinct  $[Sb(PO_4)_2]$  structure types and enhanced birefringence. *Inorg. Chem.* **2021**, *60*, 1957-1964.

- [10] Zhang, D.; Wang, Q.; Zheng, T.; Cao, L. L.; Ok, K. M.; Gao, D. J.; Bi, J.; Huang, L.; Zou, G. H. Cation-anion synergetic interactions achieving tunable birefringence in quasi-one-dimensional antimony(III) fluoride oxalates. *Sci. China Mater.* **2022**, 10.1007/s40843-022-2088-0.
- [11] Yang, F.; Wang, L.; Ge, Y. W.; Huang, L.; Gao, D. J.; Bi, J.; Zou, G. H.  $K_4Sb(SO_4)_3Cl$ : The first apatite-type sulfate ultraviolet nonlinear optical material with sharply enlarged birefringence. *J. Alloys Compd.* **2020**, 834, 155154.
- [12] Chen, Y. X.; Chen, Z. X.; Zhou, Y.; Li, Y. Q.; Liu, Y. C.; Ding, Q. R.; Chen, X.; Zhao, S. G.; Luo, J. H. An antimony(III) fluoride oxalate with large birefringence. *Chem. Eur. J.* **2021**, 27, 4557-4560.
- [13] Zhang, D.; Wang, Q.; Zheng, T.; Huang, L.; Cao, L. L.; Gao, D. J.; Bi, J.; Zou, G. H.  $NH_4Sb_2(C_2O_4)_2F_5$ : A novel UV nonlinear optical material synthesized in deep eutectic solvents. *J. Alloys Compd.* **2021**, 896, 162921.
- [14] Wang, L.; Wang, H. M.; Zhang, D.; Gao, D. J.; Bi, J.; Huang, L.; Zou, G. H. Centrosymmetric  $RbSnF_2NO_3$  vs. noncentrosymmetric  $Rb_2SbF_3(NO_3)_2$ . *Inorg. Chem. Front.* **2021**, 8, 3317-3324.
- [15] Wang, L.; Yang, F.; Zhao, X. Y.; Huang, L.; Gao, D. J.; Bi, J.; Wang, X.; Zou, G. H.  $Rb_3SbF_3(NO_3)_3$ : An excellent antimony nitrate nonlinear optical material with a strong second harmonic generation response fabricated by a rational multi-component design. *Dalton Trans.* **2019**, 48, 15144-15150.
- [16] He, F. F.; Deng, Y. L.; Zhao, X. Y.; Huang, L.; Gao, D. J.; Bi, J.; Wang, X.; Zou, G. H.  $RbSbSO_4Cl_2$ : an excellent sulfate nonlinear optical material generated due to the synergistic effect of three asymmetric chromophores. *J. Mater. Chem. C* **2019**, 7, 5748-5754.
- [17] Zhang, D.; Wang, Q.; Ren, L. Y.; Cao, L. L.; Huang, L.; Gao, D. J.; Bi, J.; Zou, G. H. Sharp Enhancement of Birefringence in Antimony Oxalates Achieved by the Cation–Anion Synergetic Interaction Strategy, *Inorg. Chem.* **2022**, 61, 12481-12488.
